# Supplementary material for: “Invisible Wounds of Childbirth”; Women’s Experiences of Obstetric Violence: A Phenomenological Qualitative Study
Source: Research Square preprint supplement (doi:10.21203/rs.3.rs-6782357/v1), 2025-06-09
Supplement: Supplementary file 1 [file ae736d8d5d3bfe7bc818a375.docx]

Highlights

- Childbirth is an important experience for women, with both emotional and physical effects.

- This study has highlighted some of the considerations that need to be taken into account and some that should be avoided in order to provide effective care for women in normal labor

- There is a need for high-quality studies on obstetric violence and its prevention.
